# Supplementary material for: N-acetylcysteine modulates lipopolysaccharide-induced intestinal dysfunction
Source: PubMed Central journal article supplement (PMC6353963; doi:10.1038/s41598-018-37296-x), 2019-01-30
Supplement: 41598_2018_37296_MOESM1_ESM.pdf [file 41598_2018_37296_MOESM1_ESM.pdf]

# N-acetylcysteine modulates lipopolysaccharide-induced intestinal dysfunction

Sang In Lee<sup>1</sup> and Kyung Soo Kang<sup>2\*</sup>

## Supplemental figure 1

**A**

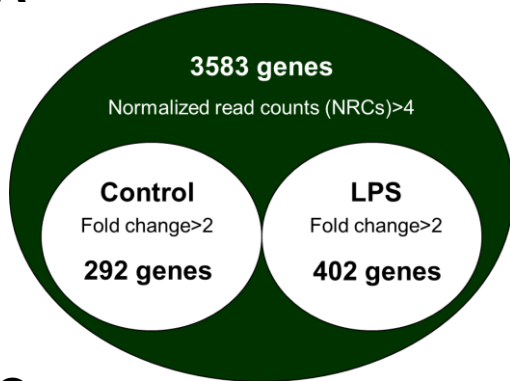

**C**

### KEGG pathway

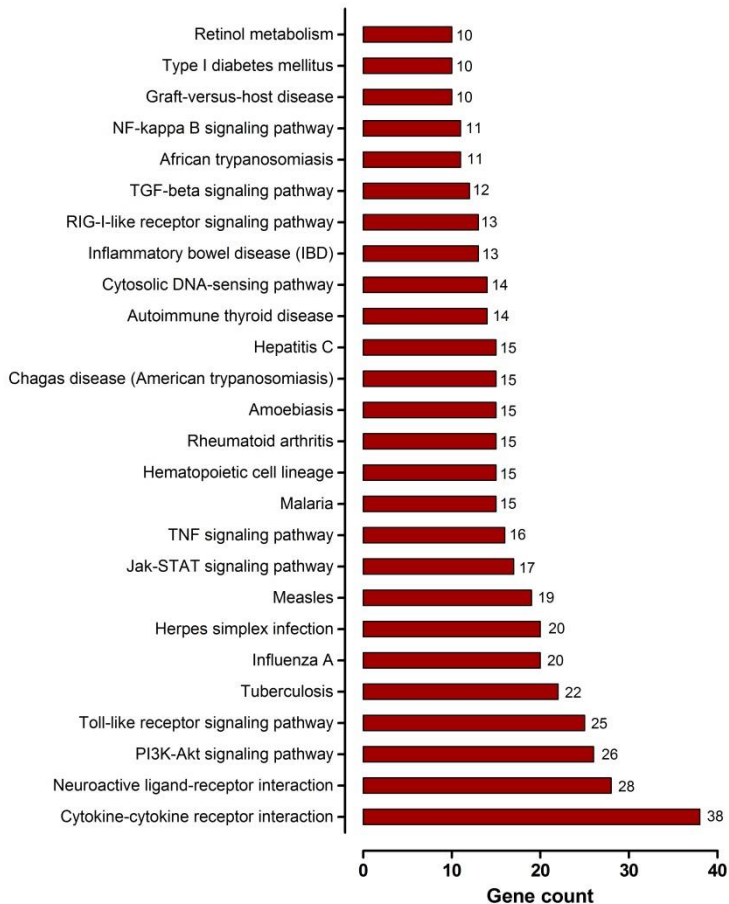

**B**

### Gene Ontology

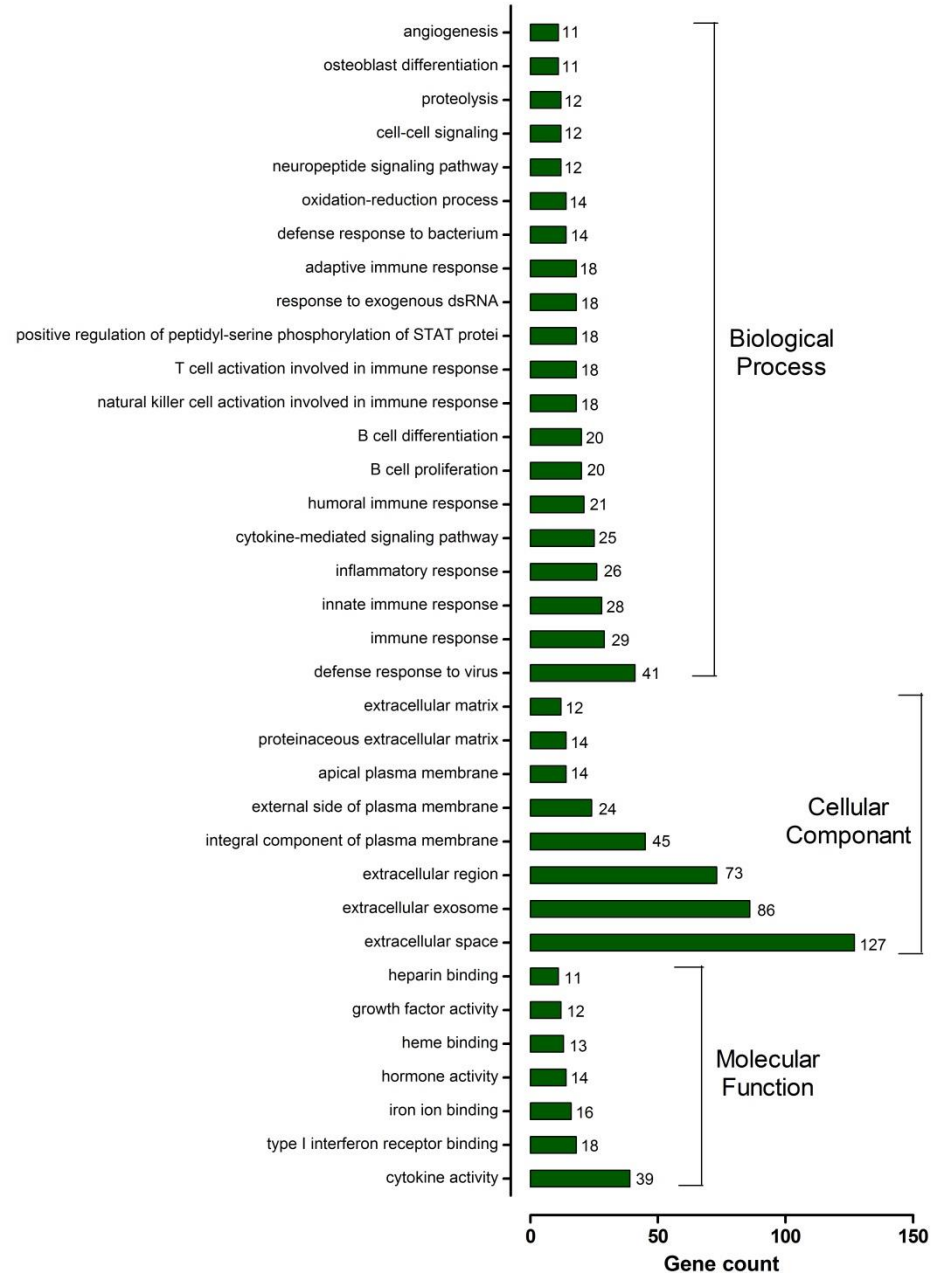

## Figure legend

**Supplemental Figure 1.** Gene expression profiling of the small intestine after dietary treatment with or without LPS challenge (a) Venn diagram illustrations of genes found to be differentially expressed with or without LPS challenge in the small intestine. The common genes from the RNAseq experiment were upregulated at least 2-fold ( $P < 0.05$ ). (b) Gene Ontology (GO) enrichment analysis of differentially expressed genes. GO terms assigned to biological process, cellular component, and molecular functions. (c) Kyoto Encyclopedia of Genes and Genomes (KEGG) pathway classification enrichment analysis of differentially expressed genes.

**Supplemental table 1. Biological process in differentially expressed genes (LPS vs LPS+NAC)**

| Term                                            | Count | P-Value  | Genes                                                                                                                                                                                                                                                                                               |
|-------------------------------------------------|-------|----------|-----------------------------------------------------------------------------------------------------------------------------------------------------------------------------------------------------------------------------------------------------------------------------------------------------|
| ssc04060:Cytokine-cytokine receptor interaction | 39    | 2.26E-08 | IL1R2, CSF2, CCL2, BMPR2, IL-6, CD70, CCL5, CCL4, CCL27, IFN-ALPHA-8, IFN-ALPHA-13, CCL25, IFNA1, IFN-ALPHA-15, IFN-ALPHA-9, IL12RB1, CCL20, IFNG, LTB, IL1A, LTA, GHR, IL6, TNFSF4, IL7, CCL19, LOC100153661, CCR9, ACVR2A, TNFSF10, ACVR2B, CCR7, IL1B2, IL1B1, IL12A, EPOR, BMPR1B, BMP7, BMPR1A |
| ssc05168:Herpes simplex infection               | 33    | 1.79E-07 | RNASEL, IFIH1, CCL2, TLR3, IL-6, OAS1, CCL5, TLR9, IFN-ALPHA-8, IFN-ALPHA-13, CASP3, IFNA1, IFN-ALPHA-15, IFN-ALPHA-9, PKR, IFNG, CASP8, TRAF6, CHUK, LTA, CDK1, IL6, SKP2, ARNTL, STAT1, LOC100153661, STAT2, IFIT1, IL1B2, IRF7, IL1B1, IL12A, JAK2                                               |
| ssc05162:Measles                                | 30    | 4.00E-09 | IFIH1, IL-6, OAS1, TLR9, IFN-ALPHA-8, IRAK4, IFN-ALPHA-13, IFNA1, IFN-ALPHA-15, IFN-ALPHA-9, PKR, CD46, IFNG, TRAF6, IL1A, CHUK, AKT3, PIK3CG, IL6, CD3E, STAT1, LOC100153661, STAT2, TNFSF10, IL1B2, FCGR2B, IRF7, IL1B1, IL12A, JAK2                                                              |
| ssc05164:Influenza A                            | 29    | 2.85E-06 | RNASEL, IFIH1, CCL2, TLR3, IL-6, OAS1, CCL5, IFN-ALPHA-8, IRAK4, IFN-ALPHA-13, IFNA1, IFN-ALPHA-15, IFN-ALPHA-9, PKR, IFNG, CASP1, AKT3, IL1A, PIK3CG, IL6, STAT1, LOC100153661, STAT2, TNFSF10, IL1B2, IRF7, IL1B1, IL12A, JAK2                                                                    |
| ssc04620:Toll-like receptor signaling pathway   | 27    | 6.99E-10 | IL-6, PMAP-36, TLR9, IRAK4, IFN-ALPHA-8, IFN-ALPHA-13, CASP3, IFNA1, IFN-ALPHA-15, IFN-ALPHA-9, IFNG, CASP8, NOS2, TRAF6, IL1A, AKT3, IL6, CREB1, STAT1, LOC100153661, CASP10, FCGR2B, IL1B2, IL1B1, IL12A, JAK2, CD14                                                                              |

|                                      |    |             |                                                                                                                                                                                                                                |
|--------------------------------------|----|-------------|--------------------------------------------------------------------------------------------------------------------------------------------------------------------------------------------------------------------------------|
| ssc05160:Hepatitis C                 | 27 | 1.19E-07    | PPARA, RNASEL, OCLN, CLDN5, LOC396566, TLR3, OAS1, CLDN10, CLDN14, IFN-ALPHA-8, IFN-ALPHA-13, IFNA1, IFN-ALPHA-15, IFN-ALPHA-9, PKR, TRAF6, CHUK, AKT3, PIK3CG, CLDN22, CLDN20, STAT1, LOC100153661, STAT2, IFIT1, IRF7, CLDN1 |
| ssc05152:Tuberculosis                | 27 | 5.24E-05    | TLR3, IL-6, TLR5, CCL5, CCL4, TLR8, TLR9, IRAK4, IFN-ALPHA-8, IFN-ALPHA-13, IFNA1, IFN-ALPHA-15, IFN-ALPHA-9, CASP8, TRAF6, CHUK, AKT3, PIK3CG, IL6, STAT1, LOC100153661, CD86, IL1B2, IRF7, IL1B1, IL12A, CD14                |
| ssc03320:PPAR signaling pathway      | 26 | 1.52E-13    | ACOX1, PPARA, ATP1B1, DRD2, GLI1, EDNRA, ATP2B1, HTR1B, BDNF, ADCY10, HTR1D, AKT3, PIK3CG, PLD1, CREB1, ATP1A2, TNNT3, SSTR2, NPY, CHRM2, CHRM1, PLN, GHRL, GHSR, LIPE, GLP1R                                                  |
| ssc04630:Jak-STAT signaling pathway  | 26 | 3.05E-06    | CSF2, IL-6, STAT6, IFN-ALPHA-8, IFN-ALPHA-13, IFNA1, IFN-ALPHA-9, IFN-ALPHA-15, IL12RB1, IFNG, AKT3, GHR, IL13RA2, PIK3CG, IL6, IL7, SOCS7, SOCS4, SOCS5, STAT1, LOC100153661, STAT2, IL12A, JAK2, EPOR                        |
| ssc04024:cAMP signaling pathway      | 26 | 0.001019931 | ACOX1, PPARA, AQP7, MMP1, APOA2, APOA1, PLIN1, APOC3, APOA5, CYP4A24, ACSL3, PLTP, ACSL5, ANGPTL4, ACADM, PCK2, CPT1A, PCK1, CD36, FABP3, FABP1, FABP2, GK, FABP7, SCP2, FABP6                                                 |
| ssc05161:Hepatitis B                 | 25 | 3.67E-05    | PIK3CG, IL6, IFIH1, EGR2, CREB1, TLR3, IL-6, RB1, LOC100153661, STAT1, STAT2, IFN-ALPHA-8, STAT6, CASP10, IFN-ALPHA-13, CASP3, IFNA1, IFN-ALPHA-9, IFN-ALPHA-15, IRF7, CASP8, CCNA2, AKT3, CHUK                                |
| ssc04062:Chemokine signaling pathway | 22 | 0.004054441 | AMCF-II, CCL1, PIK3CG, CCL2, CCL19, STAT1, CCL5, CCL4, CCL27, CCL17, STAT2, CCR9, CCL25, CCR7, CCL14, CCL20, RASGRP2, JAK2, GNB3, CRK, AKT3, CHUK                                                                              |

|                                                    |    |             |                                                                                                                                   |
|----------------------------------------------------|----|-------------|-----------------------------------------------------------------------------------------------------------------------------------|
| ssc04640:Hematopoietic cell lineage                | 20 | 5.65E-07    | PIK3CG, IL6, CCL2, CD3E, GNA11, IL-6, CCL5, TLR9, IRAK4, ACE, IL1B2, GNAQ, CASP8, IFNG, IL1B1, IL12A, NOS2, TRAF6, AKT3, CHUK     |
| ssc05142:Chagas disease (American trypanosomiasis) | 20 | 5.10E-05    | IL1R2, CSF2, IL6, IL7, CD3E, CD8B, FCER2, CD1.1, IL-6, ANPEP, GP9, CD36, CD19, IL1B2, CD59, IL1B1, MS4A1, EPOR, CD14, IL1A        |
| ssc04668:TNF signaling pathway                     | 19 | 1.86E-04    | PIK3CG, CSF2, IL6, CCL2, PTGS2, CREB1, IL-6, MMP3, CCL5, CASP10, CASP3, IL1B2, CCL20, CASP8, IL1B1, SELE, LTA, AKT3, CHUK         |
| ssc05323:Rheumatoid arthritis                      | 18 | 3.06E-05    | PIK3CG, IL1R2, CSF2, IL6, GNA11, IL-6, ACTN2, C8A, C8B, CASP3, IL1B2, GNAQ, IL1B1, IFNG, IL12A, SERPINB10, NOS2, CD14             |
| ssc05146:Amoebiasis                                | 18 | 3.55E-04    | AMCF-II, CSF2, IL6, CCL2, IL-6, MMP3, CCL5, MMP1, ATP6V1C1, ATP6V1A, CD86, IL1B2, CCL20, IL1B1, IFNG, ANGPT1, LTB, IL1A           |
| ssc04152:AMPK signaling pathway                    | 17 | 0.003607132 | PIK3CG, PRKAG3, CREB1, PRKAB2, PFKFB1, ADIPOR2, FBP2, PCK2, CPT1A, PCK1, CD36, GYS2, ADRA1A, PPP2R5E, CCNA2, LIPE, AKT3           |
| ssc04920:Adipocytokine signaling pathway           | 16 | 3.96E-05    | PRKAG3, PPARA, PRKAB2, ADIPOR2, ACACB, PCK2, CPT1A, PCK1, CD36, NPY, JAK2, AGRP, ACSL3, AKT3, CHUK, ACSL5                         |
| ssc00830:Retinol metabolism                        | 15 | 5.90E-06    | PRKAG3, LDHC, PPARA, CREB1, PFKFB1, PRKAB2, ACACB, PCK2, CPT1A, PCK1, GCG, GNAQ, SLC2A2, GYS2, AKT3                               |
| ssc04623:Cytosolic DNA-sensing pathway             | 15 | 2.68E-05    | KCNMA1, TRPC1, ATP1B1, PNLIPRP1, CLCA1, ATP1A2, SCTR, ATP2B1, GNAQ, ATP2A1, PLA2G12B, CELA2A, SLC4A4, PLA2G2D, PLA2G2F            |
| ssc04972:Pancreatic secretion                      | 15 | 0.001204216 | IL6, IL-6, LOC100153661, CCL5, CCL4, IFN-ALPHA-8, IFN-ALPHA-13, IFNA1, IFN-ALPHA-9, IFN-ALPHA-15, IL1B2, IRF7, IL1B1, CASP1, CHUK |

|                                                |    |             |                                                                                                                           |
|------------------------------------------------|----|-------------|---------------------------------------------------------------------------------------------------------------------------|
| ssc04922:Glucagon signaling pathway            | 15 | 0.003169166 | RDH12, UGT1A6, LRAT, CYP1A1, CYP2C42, UGT2B31, AOX1, AOX2, SDR16C5, CYP2A19, CYP1A2, RDH16, CYP4A24, CYP2B22, CYP2C49     |
| ssc05204:Chemical carcinogenesis               | 13 | 4.00E-04    | AMCF-II, IL6, IL-6, IRAK4, CASP3, IL1B2, IL1B1, IL12A, NOS2, CASP1, TRAF6, IL1A, CD14                                     |
| ssc05321:Inflammatory bowel disease (IBD)      | 13 | 4.70E-04    | IFIH1, LOC100153661, IFN-ALPHA-8, IFN-ALPHA-13, CASP10, IFNA1, IFN-ALPHA-15, IFN-ALPHA-9, IRF7, CASP8, IL12A, TRAF6, CHUK |
| ssc00590:Arachidonic acid metabolism           | 13 | 5.49E-04    | GPX2, PLA2G16, CYP2J34, PTGS2, CYP2C42, PLA2G12B, EPHX2, GGT1, PLA2G2D, CYP2B22, CYP4A24, CYP2C49, PLA2G2F                |
| ssc04622:RIG-I-like receptor signaling pathway | 13 | 0.001295649 | STAT6, IL6, IL12RB1, IL1B2, IFNG, IL1B1, IL12A, IL-6, TLR5, FOXP3, STAT1, IL1A                                            |
| ssc05133:Pertussis                             | 13 | 0.002433038 | GSTA1, GSTA2, CYP1A1, PTGS2, CYP2C42, CYP1A2, CYP2B22, UGT1A6, LOC780435, LOC100514231, UGT2B31, GSTO1, CYP2C49           |
| ssc00982:Drug metabolism - cytochrome P450     | 12 | 2.41E-04    | KCNMA1, ATP2B1, KCNN4, ATP1B1, GNAQ, LYZ, AQP5, ADRA1A, ATP1A2, PMAP-36, DMBT1                                            |
| ssc04970:Salivary secretion                    | 12 | 0.007941387 | GSTA1, UGT1A6, GSTA2, LOC780435, LOC100514231, FMO1, MAOA, UGT2B31, AOX1, AOX2, CYP1A2, GSTO1                             |
| ssc05143:African trypanosomiasis               | 11 | 3.95E-05    | IRAK4, IL1B2, PTGS2, IFNG, IL1B1, IL12A, JAK2, NOS2, TRAF6, STAT1, IL1A                                                   |
| ssc05140:Leishmaniasis                         | 11 | 0.006272287 | CASP3, IL6, IL1B2, IL1B1, CASP8, IL12A, IL-6, TLR5, SAR1B, CASP1, CD14                                                    |
| ssc05134:Legionellosis                         | 11 | 0.006272287 | IL6, APOA1, GNAQ, IL1B2, THOP1, IFNG, IL1B1, IL12A, IL-6, SELE, TLR9                                                      |
| ssc04975:Fat digestion and absorption          | 10 | 2.36E-04    | IL6, CCL2, CD36, IL1B2, IFNG, IL1B1, IL12A, IL-6, SELE, TLR9                                                              |
| ssc04621:NOD-like receptor signaling pathway   | 10 | 0.004455668 | IL6, CCL2, IL1B2, IL1B1, CASP8, IL-6, CCL5, TRAF6, CASP1, CHUK                                                            |
| ssc05144:Malaria                               | 10 | 0.005829896 | APOA4, PNLI PRP1, CD36, APOA1, PLA2G12B, FABP1, FABP2, PLA2G2D, PLA2G2F, MTPP                                             |

**Supplemental table 2. Molecular function in differentially expressed genes (LPS vs LPS+NAC)**

| Term                           | Count | P-Value  | Genes                                                                                                                                                                                                                                                                                                                                                                                                                                                                                                                                                                                                                                                                                                                                                                                                                                                                                                                                                                                                                                                    |
|--------------------------------|-------|----------|----------------------------------------------------------------------------------------------------------------------------------------------------------------------------------------------------------------------------------------------------------------------------------------------------------------------------------------------------------------------------------------------------------------------------------------------------------------------------------------------------------------------------------------------------------------------------------------------------------------------------------------------------------------------------------------------------------------------------------------------------------------------------------------------------------------------------------------------------------------------------------------------------------------------------------------------------------------------------------------------------------------------------------------------------------|
| GO:0005615~extracellular space | 128   | 4.62E-30 | EDN3, ST00A8, ST00A9, GDF5, POSTN, VTN, TTR, APOA1, IFNG, IFN-OMEGA-6, MS4A1, IFN-OMEGA-4, IFN-DELTA-11, IFN-OMEGA-5, IFN-DELTA-10, IFN-OMEGA-2, MUC13, PPAG3, IL1A, LOC100157354, AMY2, WNT10B, CLCA1, ADAMTS20, BPIFA1, F8, MFGE8, LOC100153661, CBLN3, F3, STC1, AMCF-II, XDH, CCL1, BPIFB1, CCL2, BMPR2, CD70, GAST, CCL5, IFN-ALPHA-17, IL34, CCL4, IFN-ALPHA-16, IFN-ALPHA-13, IFNA1, IFN-ALPHA-14, ACE, IFN-ALPHA-15, ALB, SFTPD, ANGPTL1, SERPINA3-2, AGRP, PLTP, TNFSF10, IL1B2, NPY, SFRP2, CD59, IL1B1, AREG, BMP7, BMP5, IGFBP6, UFBP, IL-6, ANPEP, IFN-ALPHA-8, NPG4, IFN-ALPHA-9, SERPINA7, IFN-ALPHA-4, HAMP, IFN-ALPHA-5, TGFA, LTF, ANGPT1, LTB, DPEP1, LTA, HYAL1, IFN-DELTA-9, ZP3, CILP, IFN-DELTA-5, LYZ, IFN-DELTA-6, IFN-DELTA-7, INHA, IFN-DELTA-1, IFN-DELTA-2, IFN-DELTA-3, IFN-DELTA-4, PROC, INHBA, IL12A, SLPI, GHRL, CSF2, NDP, CCL25, CCL20, C1QTNF2, SERPINB10, KRT2, PTX3, LOC100156936, IL6, TNFSF4, IL7, ICA, FBN1, CCL19, PAG6, CELA1, LOC100155760, CCL17, GCG, AFP, DKK1, CCL14, ACE2, GDF11, CELA2A, IGFBP1, GKN1 |

|                                           |     |             |                                                                                                                                                                                                                                                                                                                                                                                                                                                                                                                                                                                                                                                                                                                                                                                                                                          |
|-------------------------------------------|-----|-------------|------------------------------------------------------------------------------------------------------------------------------------------------------------------------------------------------------------------------------------------------------------------------------------------------------------------------------------------------------------------------------------------------------------------------------------------------------------------------------------------------------------------------------------------------------------------------------------------------------------------------------------------------------------------------------------------------------------------------------------------------------------------------------------------------------------------------------------------|
| GO:0070062~extracellular exosome          | 121 | 4.22E-04    | LDHC, ATP1B1, S100A8, CHMP4C, GNA11, S100A9, AQP5, RPLP2, ENPEP, AQP2, ST3GAL1, APOA4, TTR, APOA2, ASPA, GOT1, APOA1, APOE, CD46, MS4A1, APOM, MUC13, RAB27A, ACAA2, F11R, MYO6, MFGE8, ACTN2, FBP2, NPC1, F3, ABAT, BPIFB1, FCER2, CD70, GALM, ACE, RPS28, STX12, HNMT, ALB, APOC3, ANGPTL1, AGRP, GPD1, CACNA2D1, EPHX2, S100A10, LGALS8, CD5L, DNASE1, TNFSF10, CD59, IL1B1, CD79B, FABP1, SLC46A3, STEAP4, IGFBP6, DUOX2, ANPEP, SDCBP2, GPX2, ACTR2, SERPINA7, ITIH4, LTF, ANGPT1, CAT, TUBB1, RHOF, DPP4, DPEP1, HYAL1, CDK1, CILP, LYZ, CYB5A, MAN1A1, DECR1, ATP6V1C1, C8A, MTMR11, ATP6V1A, C8B, CD86, CTH, PSME2, CLIC5, SCIN, CYBRD1, CA4, SLPI, GNB3, CAPS, MAL2, C6, APLP2, TAC3, TMEM33, FAT1, KRT2, PAFAH1B1, HRG, ETFA, DLST, LIPA, FBN1, HOGA1, KLK1, PCK2, ANXA4, PCK1, SDHB, CD19, KRT74, IRF6, AOX1, ACE2, MAT2B, CP |
| GO:0005576~extracellular region           | 85  | 2.64E-26    | CGA, WAP-3, WAP-1, IGFBP6, FST, IL-6, SAL1, PMAP-36, CDSN, ST3GAL1, NPG1, BDNF, NPG3, NPG4, E4, ITIH4, LTF, ITIH2, ANGPT1, GUCA2A, GUCA2B, CASP1, GHR, COL10A1, CRISP2, LYZ, PMAP-23, MFGE8, F7, FGF21, INHA, PG-2, PROC, INHBA, CHGA, NPC1, IL12A, GHRL, PLA2G2D, PLA2G2F, PR39, C14H10ORF99, AWN, GAST, OAS1, TRH, CCL4, LEAP2, CCL27, TAC3, CCL25, PRRG4, ZBPB, C1QTNF3, FGB, PLA2G12B, SCG5, AGRP, IL6, PNLIPRP1, LOC396757, LOC396756, IL7, LOC396897, FBN1, CRSP3, PTGFR, AGER, LCN2, SFRP5, DNASE1, LOC692190, SPAI-2, DKK1, NPY, CD59, NPW, PON1, GDF11, ADM5, ADM2, IGFBP1, BMP7, BMP5, DMBT1                                                                                                                                                                                                                                   |
| GO:0005789~endoplasmic reticulum membrane | 22  | 0.009538405 | HSD3B1, CYP1A1, DUOXA1, CYP2C42, CYB5A, CYP1A2, MAN1A1, GUCY2C, CDS1, RTN1, DTNBP1, TLR9, CYP4A21, INSIG2, FITM1, FMO1, FKBP14, SDR16C5, DIO1, SAR1B, CYP4A24, DPEP1                                                                                                                                                                                                                                                                                                                                                                                                                                                                                                                                                                                                                                                                     |



|                                             |    |             |                                                                                                                                                    |
|---------------------------------------------|----|-------------|----------------------------------------------------------------------------------------------------------------------------------------------------|
| GO:0016324~apical plasma membrane           | 21 | 1.02E-05    | KCNMA1, ATP1B1, PLD1, MYO7A, DUOX2, AQP5, DUOX1, SLC7A9, AQP6, ENPEP, AQP2, ATP6V1A, DRAM2, SLC2A2, SLC22A4, CLDN1, CA4, S100G, MUC13, DPP4, DPEP1 |
| GO:0009897~external side of plasma membrane | 17 | 0.001136053 | CD3E, CD8B, FCER2, ANPEP, MFGE8, ENPEP, CCR7, CD86, ACE, IL12RB1, CD19, IFNG, MS4A1, CD79B, CD79A, BMPR1A, CD200R1                                 |
| GO:0005765~lysosomal membrane               | 15 | 0.003801106 | PLD1, STARD3NL, GNA11, MYO7A, TLR3, ANPEP, ENPEP, ATP6V1C1, LNPEP, ATP6V1A, NPC1, AP3M1, RNF152, CP, DPP4                                          |
| GO:0031012~extracellular matrix             | 13 | 0.004535706 | ZP2, ZP3, ADAMTS20, NDP, CILP, MFGE8, VTN, MMP3, MMP12, MMP1, APOE, F3, SLPI                                                                       |
| GO:0072562~blood microparticle              | 12 | 3.41E-04    | C8A, APOA4, APOA2, APOA1, APOE, ALB, APOA5, ITIH4, HRG, CD5L, CP, ANGPTL4                                                                          |
| GO:0005923~bicellular tight junction        | 10 | 0.008453262 | F11R, OCLN, BVES, CLDN5, LOC396566, CLDN1, CLDN22, CLDN10, CLDN20, CLDN14                                                                          |

**Supplemental table 3. Cellular component in differentially expressed genes (LPS vs LPS+NAC)**

| Term                                                    | Count | PValue      | Genes                                                                                                                                                                                                                                                                                                                                                              |
|---------------------------------------------------------|-------|-------------|--------------------------------------------------------------------------------------------------------------------------------------------------------------------------------------------------------------------------------------------------------------------------------------------------------------------------------------------------------------------|
| GO:0005125~cytokine activity                            | 37    | 8.46E-17    | CSF2, NDP, GDF5, CD70, IFN-ALPHA-16, IFN-ALPHA-13, IFN-ALPHA-14, IFNA1, IFN-ALPHA-4, IFNG, IFN-ALPHA-5, IFN-OMEGA-6, IFN-OMEGA-4, IFN-DELTA-11, IFN-OMEGA-5, IFN-DELTA-10, IFN-OMEGA-2, LTB, IL1A, LTA, IL6, IFN-DELTA-9, IL7, IFN-DELTA-5, IFN-DELTA-7, INHA, LOC100153661, IFN-DELTA-3, LOC100155760, IFN-DELTA-4, INHBA, IL1B2, IL1B1, GDF11, IL12A, BMP7, BMP5 |
| GO:0020037~heme binding                                 | 19    | 5.27E-05    | CYP24A1, CYP1A1, PTGS2, CYP2C42, DUOX2, DUOX1, CYB5A, CYP2A19, CYP1A2, CYP2B22, CYP2J34, CYP4A21, CYP39A1, HRG, JAK2, CAT, NOS2, CYP4A24, CYP2C49                                                                                                                                                                                                                  |
| GO:0005132~type I interferon receptor binding           | 18    | 6.96E-12    | IFN-DELTA-9, IFN-DELTA-5, IFN-DELTA-7, LOC100153661, IFN-ALPHA-16, IFN-DELTA-3, LOC100155760, IFN-DELTA-4, IFN-ALPHA-13, IFN-ALPHA-14, IFN-ALPHA-4, IFN-ALPHA-5, IFN-OMEGA-6, IFN-OMEGA-4, IFN-DELTA-11, IFN-OMEGA-5, IFN-DELTA-10, IFN-OMEGA-2                                                                                                                    |
| GO:0005506~iron ion binding                             | 15    | 0.007477803 | XDH, CYP24A1, CYP4A21, CYP2J34, CYP39A1, CYP1A1, CYP2C42, AOX1, AOX2, LTF, CYP2A19, CYP1A2, CYP4A24, CYP2B22, CYP2C49                                                                                                                                                                                                                                              |
| GO:0005215~transporter activity                         | 14    | 0.001102183 | SLC5A4, CRABP1, RBP2, SAL1, SLCO2A1, LCN2, SLC11A1, FABP3, FABP1, FABP2, FABP7, SLC46A1, FABP6                                                                                                                                                                                                                                                                     |
| GO:0016491~oxidoreductase activity                      | 14    | 0.001726206 | AKR1CL1, AKR1C4, AKR1E2, MAOA, F8, FADS3, FDXR, CYBRD1, GSTO1, LOC733635, SARDH, AKR1C1, CRYZL1                                                                                                                                                                                                                                                                    |
| GO:0005179~hormone activity                             | 12    | 1.73E-04    | GCG, CGA, INHBA, EDN3, TTR, HAMP, FBN1, CRSP3, GHRL, ADM5, GAST, INHA                                                                                                                                                                                                                                                                                              |
| GO:0008289~lipid binding                                | 12    | 2.48E-04    | APOA4, PPARA, BPIFB1, STARD4, BPIFA1, FABP3, FABP1, PEX3, FABP7, PLTP, MTPP                                                                                                                                                                                                                                                                                        |
| GO:0004867~serine-type endopeptidase inhibitor activity | 11    | 0.004469242 | SERPINA7, WAP-1, E4, ITIH4, SERPINB10, SLPI, UFBP, SERPINA3-2, ITIH2, HRG, APLP2                                                                                                                                                                                                                                                                                   |

**Supplemental table 4. KEGG pathway in differentially expressed genes (LPS vs LPS+NAC)**

| Term                                            | Count | PValue   | Genes                                                                                                                                                                                                                                                                                               |
|-------------------------------------------------|-------|----------|-----------------------------------------------------------------------------------------------------------------------------------------------------------------------------------------------------------------------------------------------------------------------------------------------------|
| ssc04060:Cytokine-cytokine receptor interaction | 39    | 2.26E-08 | IL1R2, CSF2, CCL2, BMPR2, IL-6, CD70, CCL5, CCL4, CCL27, IFN-ALPHA-8, IFN-ALPHA-13, CCL25, IFNA1, IFN-ALPHA-15, IFN-ALPHA-9, IL12RB1, CCL20, IFNG, LTB, IL1A, LTA, GHR, IL6, TNFSF4, IL7, CCL19, LOC100153661, CCR9, ACVR2A, TNFSF10, ACVR2B, CCR7, IL1B2, IL1B1, IL12A, EPOR, BMPR1B, BMP7, BMPR1A |
| ssc05168:Herpes simplex infection               | 33    | 1.79E-07 | RNASEL, IFIH1, CCL2, TLR3, IL-6, OAS1, CCL5, TLR9, IFN-ALPHA-8, IFN-ALPHA-13, CASP3, IFNA1, IFN-ALPHA-15, IFN-ALPHA-9, PKR, IFNG, CASP8, TRAF6, CHUK, LTA, CDK1, IL6, SKP2, ARNTL, STAT1, LOC100153661, STAT2, IFIT1, IL1B2, IRF7, IL1B1, IL12A, JAK2                                               |
| ssc05162:Measles                                | 30    | 4.00E-09 | IFIH1, IL-6, OAS1, TLR9, IFN-ALPHA-8, IRAK4, IFN-ALPHA-13, IFNA1, IFN-ALPHA-15, IFN-ALPHA-9, PKR, CD46, IFNG, TRAF6, IL1A, CHUK, AKT3, PIK3CG, IL6, CD3E, STAT1, LOC100153661, STAT2, TNFSF10, IL1B2, FCGR2B, IRF7, IL1B1, IL12A, JAK2                                                              |
| ssc05164:Influenza A                            | 29    | 2.85E-06 | RNASEL, IFIH1, CCL2, TLR3, IL-6, OAS1, CCL5, IFN-ALPHA-8, IRAK4, IFN-ALPHA-13, IFNA1, IFN-ALPHA-15, IFN-ALPHA-9, PKR, IFNG, CASP1, AKT3, IL1A, PIK3CG, IL6, STAT1, LOC100153661, STAT2, TNFSF10, IL1B2, IRF7, IL1B1, IL12A, JAK2                                                                    |
| ssc04620:Toll-like receptor signaling pathway   | 27    | 6.99E-10 | IL-6, PMAP-36, TLR9, IRAK4, IFN-ALPHA-8, IFN-ALPHA-13, CASP3, IFNA1, IFN-ALPHA-15, IFN-ALPHA-9, IFNG, CASP8, NOS2, TRAF6, IL1A, AKT3, IL6, CREB1, STAT1, LOC100153661, CASP10, FCGR2B, IL1B2, IL1B1, IL12A, JAK2, CD14                                                                              |

|                                      |    |             |                                                                                                                                                                                                                                |
|--------------------------------------|----|-------------|--------------------------------------------------------------------------------------------------------------------------------------------------------------------------------------------------------------------------------|
| ssc05160:Hepatitis C                 | 27 | 1.19E-07    | PPARA, RNASEL, OCLN, CLDN5, LOC396566, TLR3, OAS1, CLDN10, CLDN14, IFN-ALPHA-8, IFN-ALPHA-13, IFNA1, IFN-ALPHA-15, IFN-ALPHA-9, PKR, TRAF6, CHUK, AKT3, PIK3CG, CLDN22, CLDN20, STAT1, LOC100153661, STAT2, IFIT1, IRF7, CLDN1 |
| ssc05152:Tuberculosis                | 27 | 5.24E-05    | TLR3, IL-6, TLR5, CCL5, CCL4, TLR8, TLR9, IRAK4, IFN-ALPHA-8, IFN-ALPHA-13, IFNA1, IFN-ALPHA-15, IFN-ALPHA-9, CASP8, TRAF6, CHUK, AKT3, PIK3CG, IL6, STAT1, LOC100153661, CD86, IL1B2, IRF7, IL1B1, IL12A, CD14                |
| ssc03320:PPAR signaling pathway      | 26 | 1.52E-13    | ACOX1, PPARA, ATP1B1, DRD2, GLI1, EDNRA, ATP2B1, HTR1B, BDNF, ADCY10, HTR1D, AKT3, PIK3CG, PLD1, CREB1, ATP1A2, TNNI3, SSTR2, NPY, CHRM2, CHRM1, PLN, GHRL, GHSR, LIPE, GLP1R                                                  |
| ssc04630:Jak-STAT signaling pathway  | 26 | 3.05E-06    | CSF2, IL-6, STAT6, IFN-ALPHA-8, IFN-ALPHA-13, IFNA1, IFN-ALPHA-9, IFN-ALPHA-15, IL12RB1, IFNG, AKT3, GHR, IL13RA2, PIK3CG, IL6, IL7, SOCS7, SOCS4, SOCS5, STAT1, LOC100153661, STAT2, IL12A, JAK2, EPOR                        |
| ssc04024:cAMP signaling pathway      | 26 | 0.001019931 | ACOX1, PPARA, AQP7, MMP1, APOA2, APOA1, PLIN1, APOC3, APOA5, CYP4A24, ACSL3, PLTP, ACSL5, ANGPTL4, ACADM, PCK2, CPT1A, PCK1, CD36, FABP3, FABP1, FABP2, GK, FABP7, SCP2, FABP6                                                 |
| ssc05161:Hepatitis B                 | 25 | 3.67E-05    | PIK3CG, IL6, IFIH1, EGR2, CREB1, TLR3, IL-6, RB1, LOC100153661, STAT1, STAT2, IFN-ALPHA-8, STAT6, CASP10, IFN-ALPHA-13, CASP3, IFNA1, IFN-ALPHA-9, IFN-ALPHA-15, IRF7, CASP8, CCNA2, AKT3, CHUK                                |
| ssc04062:Chemokine signaling pathway | 22 | 0.004054441 | AMCF-II, CCL1, PIK3CG, CCL2, CCL19, STAT1, CCL5, CCL4, CCL27, CCL17, STAT2, CCR9, CCL25, CCR7, CCL14, CCL20, RASGRP2, JAK2, GNB3, CRK, AKT3, CHUK                                                                              |
| ssc04640:Hematopoietic cell lineage  | 20 | 5.65E-07    | PIK3CG, IL6, CCL2, CD3E, GNA11, IL-6, CCL5, TLR9, IRAK4, ACE, IL1B2, GNAQ, CASP8, IFNG, IL1B1, IL12A, NOS2, TRAF6, AKT3, CHUK                                                                                                  |

|                                                    |    |             |                                                                                                                                   |
|----------------------------------------------------|----|-------------|-----------------------------------------------------------------------------------------------------------------------------------|
| ssc05142:Chagas disease (American trypanosomiasis) | 20 | 5.10E-05    | IL1R2, CSF2, IL6, IL7, CD3E, CD8B, FCER2, CD1.1, IL-6, ANPEP, GP9, CD36, CD19, IL1B2, CD59, IL1B1, MS4A1, EPOR, CD14, IL1A        |
| ssc04668:TNF signaling pathway                     | 19 | 1.86E-04    | PIK3CG, CSF2, IL6, CCL2, PTGS2, CREB1, IL-6, MMP3, CCL5, CASP10, CASP3, IL1B2, CCL20, CASP8, IL1B1, SELE, LTA, AKT3, CHUK         |
| ssc05323:Rheumatoid arthritis                      | 18 | 3.06E-05    | PIK3CG, IL1R2, CSF2, IL6, GNA11, IL-6, ACTN2, C8A, C8B, CASP3, IL1B2, GNAQ, IL1B1, IFNG, IL12A, SERPINB10, NOS2, CD14             |
| ssc05146:Amoebiasis                                | 18 | 3.55E-04    | AMCF-II, CSF2, IL6, CCL2, IL-6, MMP3, CCL5, MMP1, ATP6V1C1, ATP6V1A, CD86, IL1B2, CCL20, IL1B1, IFNG, ANGPT1, LTB, IL1A           |
| ssc04152:AMPK signaling pathway                    | 17 | 0.003607132 | PIK3CG, PRKAG3, CREB1, PRKAB2, PFKFB1, ADIPOR2, FBP2, PCK2, CPT1A, PCK1, CD36, GYS2, ADRA1A, PPP2R5E, CCNA2, LIPE, AKT3           |
| ssc04920:Adipocytokine signaling pathway           | 16 | 3.96E-05    | PRKAG3, PPARA, PRKAB2, ADIPOR2, ACACB, PCK2, CPT1A, PCK1, CD36, NPY, JAK2, AGRP, ACSL3, AKT3, CHUK, ACSL5                         |
| ssc00830:Retinol metabolism                        | 15 | 5.90E-06    | PRKAG3, LDHC, PPARA, CREB1, PFKFB1, PRKAB2, ACACB, PCK2, CPT1A, PCK1, GCG, GNAQ, SLC2A2, GYS2, AKT3                               |
| ssc04623:Cytosolic DNA-sensing pathway             | 15 | 2.68E-05    | KCNMA1, TRPC1, ATP1B1, PNLIPRP1, CLCA1, ATP1A2, SCTR, ATP2B1, GNAQ, ATP2A1, PLA2G12B, CELA2A, SLC4A4, PLA2G2D, PLA2G2F            |
| ssc04972:Pancreatic secretion                      | 15 | 0.001204216 | IL6, IL-6, LOC100153661, CCL5, CCL4, IFN-ALPHA-8, IFN-ALPHA-13, IFNA1, IFN-ALPHA-9, IFN-ALPHA-15, IL1B2, IRF7, IL1B1, CASP1, CHUK |
| ssc04922:Glucagon signaling pathway                | 15 | 0.003169166 | RDH12, UGT1A6, LRAT, CYP1A1, CYP2C42, UGT2B31, AOX1, AOX2, SDR16C5, CYP2A19, CYP1A2, RDH16, CYP4A24, CYP2B22, CYP2C49             |
| ssc05204:Chemical carcinogenesis                   | 13 | 4.00E-04    | AMCF-II, IL6, IL-6, IRAK4, CASP3, IL1B2, IL1B1, IL12A, NOS2, CASP1, TRAF6, IL1A, CD14                                             |

|                                                |    |             |                                                                                                                           |
|------------------------------------------------|----|-------------|---------------------------------------------------------------------------------------------------------------------------|
| ssc05321:Inflammatory bowel disease (IBD)      | 13 | 4.70E-04    | IFIH1, LOC100153661, IFN-ALPHA-8, IFN-ALPHA-13, CASP10, IFNA1, IFN-ALPHA-15, IFN-ALPHA-9, IRF7, CASP8, IL12A, TRAF6, CHUK |
| ssc00590:Arachidonic acid metabolism           | 13 | 5.49E-04    | GPX2, PLA2G16, CYP2J34, PTGS2, CYP2C42, PLA2G12B, EPHX2, GGT1, PLA2G2D, CYP2B22, CYP4A24, CYP2C49, PLA2G2F                |
| ssc04622:RIG-I-like receptor signaling pathway | 13 | 0.001295649 | STAT6, IL6, IL12RB1, IL1B2, IFNG, IL1B1, IL12A, IL-6, TLR5, FOXP3, STAT1, IL1A                                            |
| ssc05133:Pertussis                             | 13 | 0.002433038 | GSTA1, GSTA2, CYP1A1, PTGS2, CYP2C42, CYP1A2, CYP2B22, UGT1A6, LOC780435, LOC100514231, UGT2B31, GSTO1, CYP2C49           |
| ssc00982:Drug metabolism - cytochrome P450     | 12 | 2.41E-04    | KCNMA1, ATP2B1, KCNN4, ATP1B1, GNAQ, LYZ, AQP5, ADRA1A, ATP1A2, PMAP-36, DMBT1                                            |
| ssc04970:Salivary secretion                    | 12 | 0.007941387 | GSTA1, UGT1A6, GSTA2, LOC780435, LOC100514231, FMO1, MAOA, UGT2B31, AOX1, AOX2, CYP1A2, GSTO1                             |
| ssc05143:African trypanosomiasis               | 11 | 3.95E-05    | IRAK4, IL1B2, PTGS2, IFNG, IL1B1, IL12A, JAK2, NOS2, TRAF6, STAT1, IL1A                                                   |
| ssc05140:Leishmaniasis                         | 11 | 0.006272287 | CASP3, IL6, IL1B2, IL1B1, CASP8, IL12A, IL-6, TLR5, SAR1B, CASP1, CD14                                                    |
| ssc05134:Legionellosis                         | 11 | 0.006272287 | IL6, APOA1, GNAQ, IL1B2, THOP1, IFNG, IL1B1, IL12A, IL-6, SELE, TLR9                                                      |
| ssc04975:Fat digestion and absorption          | 10 | 2.36E-04    | IL6, CCL2, CD36, IL1B2, IFNG, IL1B1, IL12A, IL-6, SELE, TLR9                                                              |
| ssc04621:NOD-like receptor signaling pathway   | 10 | 0.004455668 | IL6, CCL2, IL1B2, IL1B1, CASP8, IL-6, CCL5, TRAF6, CASP1, CHUK                                                            |
| ssc05144:Malaria                               | 10 | 0.005829896 | APOA4, PNLIPRP1, CD36, APOA1, PLA2G12B, FABP1, FABP2, PLA2G2D, PLA2G2F, MTPP                                              |

**Supplemental table 5. Biological process in differentially expressed genes (Control vs LPS)**

| Term                                 | Count | PValue   | Genes                                                                                                                                                                                                                                                                                                                                                                                                                                                                                  |
|--------------------------------------|-------|----------|----------------------------------------------------------------------------------------------------------------------------------------------------------------------------------------------------------------------------------------------------------------------------------------------------------------------------------------------------------------------------------------------------------------------------------------------------------------------------------------|
| GO:0051607~defense response to virus | 41    | 7.99E-26 | CXCL9, IFN-ALPHA-17, IFN-ALPHA-16, CXCL10, TLR9, IFN-ALPHA-8, IFN-ALPHA-13, IFN-ALPHA-14, IFNA1, IFN-ALPHA-15, IFN-ALPHA-9, IFN-ALPHA-4, IFN-ALPHA-10, IFN-ALPHA-5, IFN-OMEGA-6, IFN-DELTA-11, IFN-OMEGA-4, LOC100153325, IFN-OMEGA-5, IFN-DELTA-10, IFN-ALPHA-1, LOC100156936, MX1, IFN-OMEGA-2, MX2, LOC100157354, IFN-DELTA-9, BST2, IFN-DELTA-5, IFN-DELTA-6, IFN-DELTA-7, IFN-DELTA-8, CD40, NLRP3, IFN-DELTA-1, LOC100153661, IFN-DELTA-2, IFN-DELTA-3, IFN-DELTA-4, OASL, IL12B |
| GO:0006955~immune response           | 29    | 3.43E-08 | C7, CXCL2, CXCL9, IL-6, IL13, CXCL11, CCL27, IL10, CXCL10, SLA-1, CCL3L1, THBS1, LTB, CD28, IL6, LOC100622689, IL7, CCL19, GZMB, CD40, C8A, C8B, OASL, CCR7, CD36, IL1B2, IL1B1, CD274, IL12B                                                                                                                                                                                                                                                                                          |
| GO:0045087~innate immune response    | 28    | 3.68E-09 | S100A8, S100A9, TLR2, IFN-ALPHA-16, TLR9, IFN-ALPHA-13, IFN-ALPHA-14, IFN-ALPHA-4, IFN-ALPHA-5, IFN-OMEGA-6, IFN-OMEGA-4, IFN-DELTA-11, IFN-DELTA-10, IFN-ALPHA-1, IFN-OMEGA-5, IFN-OMEGA-2, PTX3, MX2, IFN-DELTA-9, IFN-DELTA-5, FADD, IFN-DELTA-7, LOC100153661, IFN-DELTA-3, IFN-DELTA-4, S100A12, LOC692190, CD14                                                                                                                                                                  |
| GO:0006954~inflammatory response     | 26    | 5.57E-07 | CCL2, PTGS2, CRHBP, CXCL2, TLR2, CXCL9, IL13, CXCL11, IL10, TLR9, CXCL10, IL17A, CCL3L1, THBS1, PTGER3, HYAL3, CHI3L1, CCL19, CD40, NLRP3, S100A12, GPR33, CCR7, CCR3, BMPR1B, CD14                                                                                                                                                                                                                                                                                                    |

|                                                         |    |          |                                                                                                                                                                                                                                                                                              |
|---------------------------------------------------------|----|----------|----------------------------------------------------------------------------------------------------------------------------------------------------------------------------------------------------------------------------------------------------------------------------------------------|
| GO:0019221~cytokine-mediated signaling pathway          | 25 | 1.81E-11 | CCL2, IFN-DELTA-9, IFN-DELTA-5, IFN-DELTA-7, DCN, LOC100153661, IFN-ALPHA-16, IFN-DELTA-3, IFN-DELTA-4, IL12RB2, IFN-ALPHA-13, IFN-ALPHA-14, IL1B2, IFN-ALPHA-4, IFN-ALPHA-5, IL1B1, IFN-OMEGA-6, IFN-DELTA-11, IFN-OMEGA-4, IFN-OMEGA-5, IFN-ALPHA-1, IFN-DELTA-10, IL12B, IFN-OMEGA-2, GHR |
| GO:0006959~humoral immune response                      | 21 | 2.27E-14 | TNF, IFN-DELTA-9, IL7, IFN-DELTA-5, IFN-DELTA-7, LOC100153661, IFN-ALPHA-16, IFN-DELTA-3, IFN-DELTA-4, IFN-ALPHA-13, IFN-ALPHA-14, IFN-ALPHA-4, IFN-ALPHA-5, IFN-OMEGA-6, IFN-OMEGA-4, IFN-DELTA-11, IFN-OMEGA-5, IFN-DELTA-10, IFN-ALPHA-1, IFN-OMEGA-2, LTA                                |
| GO:0042100~B cell proliferation                         | 20 | 8.62E-15 | IFN-DELTA-9, IFN-DELTA-5, LEF1, IFN-DELTA-7, IL7R, LOC100153661, IFN-ALPHA-16, IFN-DELTA-3, IFN-DELTA-4, IFN-ALPHA-13, IFN-ALPHA-14, IFN-ALPHA-4, IFN-ALPHA-5, IFN-OMEGA-6, IFN-OMEGA-4, IFN-DELTA-11, IFN-OMEGA-5, IFN-ALPHA-1, IFN-DELTA-10, IFN-OMEGA-2                                   |
| GO:0030183~B cell differentiation                       | 20 | 1.05E-11 | IFN-DELTA-9, IFN-DELTA-5, IFN-DELTA-7, LOC100153661, IFN-ALPHA-16, IFN-DELTA-3, IFN-DELTA-4, DCLRE1C, IFN-ALPHA-13, IFN-ALPHA-14, IFN-ALPHA-4, IFN-ALPHA-5, IFN-OMEGA-6, CD79B, IFN-OMEGA-4, IFN-DELTA-11, IFN-OMEGA-5, IFN-ALPHA-1, IFN-DELTA-10, IFN-OMEGA-2                               |
| GO:0002323~natural killer cell activation involved in i | 18 | 7.08E-14 | IFN-DELTA-9, IFN-DELTA-5, IFN-DELTA-7, LOC100153661, IFN-ALPHA-16, IFN-DELTA-3, IFN-DELTA-4, IFN-ALPHA-13, IFN-ALPHA-14, IFN-ALPHA-4, IFN-ALPHA-5, IFN-OMEGA-6, IFN-OMEGA-4, IFN-DELTA-11, IFN-OMEGA-5, IFN-ALPHA-1, IFN-DELTA-10, IFN-OMEGA-2                                               |
| GO:0002286~T cell activation involved in immune resp    | 18 | 1.20E-13 | IFN-DELTA-9, IFN-DELTA-5, IFN-DELTA-7, LOC100153661, IFN-ALPHA-16, IFN-DELTA-3, IFN-DELTA-4, IFN-ALPHA-13, IFN-ALPHA-14, IFN-ALPHA-4, IFN-ALPHA-5, IFN-OMEGA-6, IFN-OMEGA-4, IFN-DELTA-11, IFN-OMEGA-5, IFN-ALPHA-1, IFN-DELTA-10, IFN-OMEGA-2                                               |



|                                                       |    |             |                                                                                                                                                                                                                                                |
|-------------------------------------------------------|----|-------------|------------------------------------------------------------------------------------------------------------------------------------------------------------------------------------------------------------------------------------------------|
| GO:0033141~positive regulation of peptidyl-serine pho | 18 | 1.20E-13    | IFN-DELTA-9, IFN-DELTA-5, IFN-DELTA-7, LOC100153661, IFN-ALPHA-16, IFN-DELTA-3, IFN-DELTA-4, IFN-ALPHA-13, IFN-ALPHA-14, IFN-ALPHA-4, IFN-ALPHA-5, IFN-OMEGA-6, IFN-OMEGA-4, IFN-DELTA-11, IFN-OMEGA-5, IFN-ALPHA-1, IFN-DELTA-10, IFN-OMEGA-2 |
| GO:0043330~response to exogenous dsRNA                | 18 | 4.68E-12    | IFN-DELTA-9, IFN-DELTA-5, IFN-DELTA-7, LOC100153661, IFN-ALPHA-16, IFN-DELTA-3, IFN-DELTA-4, IFN-ALPHA-13, IFN-ALPHA-14, IFN-ALPHA-4, IFN-ALPHA-5, IFN-OMEGA-6, IFN-OMEGA-4, IFN-DELTA-11, IFN-OMEGA-5, IFN-ALPHA-1, IFN-DELTA-10, IFN-OMEGA-2 |
| GO:0002250~adaptive immune response                   | 18 | 6.05E-11    | IFN-DELTA-9, IFN-DELTA-5, IFN-DELTA-7, LOC100153661, IFN-ALPHA-16, IFN-DELTA-3, IFN-DELTA-4, IFN-ALPHA-13, IFN-ALPHA-14, IFN-ALPHA-4, IFN-ALPHA-5, IFN-OMEGA-6, IFN-OMEGA-4, IFN-DELTA-11, IFN-OMEGA-5, IFN-ALPHA-1, IFN-DELTA-10, IFN-OMEGA-2 |
| GO:0042742~defense response to bacterium              | 14 | 2.51E-06    | NPG1, LOC692190, NPG3, NPG4, PR39, FCGR1A, LYZ, ROMO1, PMAP-23, HP, PMAP-36, IL10, LEAP2, PG-2                                                                                                                                                 |
| GO:0055114~oxidation-reduction process                | 14 | 0.006825286 | LDHC, CYB561, FTH1, SOD2, IYD, CYP4A21, DHRS4, DIO2, DIO3, MIOX, NOS3, CCS, DIO1, CYP4A24                                                                                                                                                      |
| GO:0007218~neuropeptide signaling pathway             | 12 | 4.08E-05    | RXFP4, HCRTR1, SSTR2, PRLHR, CYSLTR2, NPW, GALP, PYY, POMC, AGRP, GPR1, ADCYAP1                                                                                                                                                                |
| GO:0007267~cell-cell signaling                        | 12 | 2.33E-04    | NTF3, FGF9, CCL3L1, IL7, ADRA1A, GJA1, ADRA2B, PYY, LHB, ADRA1D, SHH, IHH                                                                                                                                                                      |
| GO:0006508~proteolysis                                | 12 | 0.004139457 | CLCA1, THOP1, ANPEP, LOC100302368, PAG6, CELA2A, ENPEP, CPB1, CAPN3, PPAG3, PLG, DPP4                                                                                                                                                          |
| GO:0001649~osteoblast differentiation                 | 11 | 2.09E-04    | BMP3, CYP24A1, BGLAP, FGF9, CCL3L1, RSPO2, LEF1, GJA1, VCAN, MYOC, SPP1                                                                                                                                                                        |
| GO:0001525~angiogenesis                               | 11 | 0.007735913 | FGF9, TGFA, NOS3, ANPEP, ANGPT1, ADM2, MFGE8, ENPEP, ANGPT2, ENG, ANGPTL4                                                                                                                                                                      |

**Supplemental table 6. Molecular function in differentially expressed genes (Control vs LPS)**

| <b>Term</b>                                   | <b>Count</b> | <b>PValue</b> | <b>Genes</b>                                                                                                                                                                                                                                                                                                                                                                   |
|-----------------------------------------------|--------------|---------------|--------------------------------------------------------------------------------------------------------------------------------------------------------------------------------------------------------------------------------------------------------------------------------------------------------------------------------------------------------------------------------|
| GO:0005125~cytokine activity                  | 39           | 8.38E-24      | TNF, NDP, TGFB3, IL13, IFN-ALPHA-16, IL10, TIMP1, IFN-ALPHA-13, IFN-ALPHA-14, IFNA1, IL17A, IFN-ALPHA-4, IFN-ALPHA-5, IFN-OMEGA-6, IFN-DELTA-11, IFN-OMEGA-4, IFN-OMEGA-5, IFN-DELTA-10, IFN-ALPHA-1, IFN-OMEGA-2, LTB, LTA, SPP1, BMP3, IL6, IFN-DELTA-9, IL7, IFN-DELTA-5, IFN-DELTA-7, INHA, LOC100153661, IFN-DELTA-3, IFN-DELTA-4, INHBA, IL1B2, IL1B1, IL12B, BMP7, BMP5 |
| GO:0005132~type I interferon receptor binding | 18           | 2.58E-14      | IFN-DELTA-9, IFN-DELTA-5, IFN-DELTA-7, LOC100153661, IFN-ALPHA-16, IFN-DELTA-3, IFN-DELTA-4, IFN-ALPHA-13, IFN-ALPHA-14, IFN-ALPHA-4, IFN-ALPHA-5, IFN-OMEGA-6, IFN-OMEGA-4, IFN-DELTA-11, IFN-OMEGA-5, IFN-ALPHA-1, IFN-DELTA-10, IFN-OMEGA-2                                                                                                                                 |
| GO:0005506~iron ion binding                   | 16           | 8.24E-05      | XDH, CYP24A1, CYP1A1, CYP2A19, CYP1A2, CDO1, FTH1, CYP2J34, CYP4A21, P4HA1, AOX2, NOS3, CYP4A24, HBB, CYP2C49, ALOX12                                                                                                                                                                                                                                                          |
| GO:0005179~hormone activity                   | 14           | 1.34E-07      | FBN1, GAST, INHA, POMC, PTHLH, GCG, RETN, TTR, INHBA, ADM, GALP, GHRL, ADM5, LHB                                                                                                                                                                                                                                                                                               |
| GO:0020037~heme binding                       | 13           | 0.001745905   | CYP24A1, CYP1A1, PTGS2, STC2, CYP2A19, CYP1A2, CYP2J34, CYP4A21, HRG, NOS3, CYP4A24, HBB, CYP2C49                                                                                                                                                                                                                                                                              |
| GO:0008083~growth factor activity             | 12           | 5.97E-06      | INHBA, IL6, NTF3, FGF9, IL7, TGFB3, HBEGF, TGFA, IL12B, INHA, AREG, TIMP1                                                                                                                                                                                                                                                                                                      |
| GO:0008201~heparin binding                    | 11           | 0.00238143    | REG4, FGF9, RSPO2, FBN1, HBEGF, HRG, CXCL11, THBS1, COL5A3, PLA2G2D, CXCL10                                                                                                                                                                                                                                                                                                    |

**Supplemental table 7. Cellular component in differentially expressed genes (Control vs LPS)**

| Term                           | Count | PValue   | Genes                                                                                                                                                                                                                                                                                                                                                                                                                                                                                                                                                                                                                                                                                                                                                                                                                                                                                                                                                                                                                                                        |
|--------------------------------|-------|----------|--------------------------------------------------------------------------------------------------------------------------------------------------------------------------------------------------------------------------------------------------------------------------------------------------------------------------------------------------------------------------------------------------------------------------------------------------------------------------------------------------------------------------------------------------------------------------------------------------------------------------------------------------------------------------------------------------------------------------------------------------------------------------------------------------------------------------------------------------------------------------------------------------------------------------------------------------------------------------------------------------------------------------------------------------------------|
| GO:0005615~extracellular space | 127   | 1.41E-43 | S100A8, CRHBP, S100A9, EDN1, SNCA, TGFB3, IL13, LOC100302368, CXCL11, SHH, IL10, CXCL10, TTR, IFN-OMEGA-6, MS4A1, IFN-OMEGA-4, IFN-DELTA-11, IFN-DELTA-10, IFN-OMEGA-5, IFN-OMEGA-2, PPAG3, LOC100157354, CLCA1, STC2, MFGE8, LOC100153661, PTHLH, CBLN3, RETN, F5, STC1, XDH, BPIFB1, CCL2, CLU, GAST, IFN-ALPHA-17, POMC, IFN-ALPHA-16, TIMP1, IFN-ALPHA-13, IFNA1, IFN-ALPHA-14, IL17A, IFN-ALPHA-15, ALB, IFN-ALPHA-10, SERPINA3-2, AGRP, SPP1, PLAT, BMP3, EFEMP1, CHI3L1, IL1B2, IL1B1, AREG, PYY, BMP7, CPB1, LHB, BMP5, FGF9, UFBP, IL-6, ANPEP, IFN-ALPHA-8, NPG4, IFN-ALPHA-9, IFN-ALPHA-4, CCL3L1, IFN-ALPHA-5, TGFA, ANGPT1, LOC100153325, IFN-ALPHA-1, ANGPT2, LTB, LTA, IHH, IFN-DELTA-9, ZP3, CILP, IFN-DELTA-5, LYZ, IFN-DELTA-6, IFN-DELTA-7, INHA, IFN-DELTA-8, IFN-DELTA-1, IFN-DELTA-2, IFN-DELTA-3, IFN-DELTA-4, INHBA, ADM, CA6, GHRL, VCAN, IL12B, TG, TF, TNF, LUM, NDP, CXCL2, CXCL9, DCN, VCAM1, SERPINB10, ENO3, THBS1, PTX3, LOC100156936, MYOC, IL6, IL7, ICA, FBN1, CCL19, PAG6, GCG, AFP, ACE2, HBEGF, CELA2A, IGFBP4, IGFBP5 |

|                                                  |    |             |                                                                                                                                                                                                                                                                                                                                                                                                                                                                                                                                                                    |
|--------------------------------------------------|----|-------------|--------------------------------------------------------------------------------------------------------------------------------------------------------------------------------------------------------------------------------------------------------------------------------------------------------------------------------------------------------------------------------------------------------------------------------------------------------------------------------------------------------------------------------------------------------------------|
| GO:0070062~extracellular exosome                 | 86 | 0.008787243 | RHOJ, LDHC, STEAP4, S100A8, SLC15A2, FGF9, S100A9, SAT2, CRABP2, AQP5, GJA1, PGAM2, ANPEP, ENPEP, CALB1, AQP2, ART3, TTR, ASPA, CXCR4, MIOX, MS4A1, ANGPT1, RPL11, ITIH3, TUBB1, PI16, DPP4, PEBP4, LYZ, CILP, MGP, MFGE8, FBP2, CD40, C8A, C8B, RETN, CTH, CA6, SCIN, RYR1, CA4, VMO1, PRNP, ZNHIT6, ALOX12, CAPS, TF, PRKCZ, C7, BPIFB1, FXYD3, BPIFB2, LUM, CLU, SFN, TIMP1, VCAM1, RPS28, PROCR, RPL7, ALB, UPK1A, ENO3, HRG, THBS1, AGRP, MYOC, MEST, SPP1, PLAT, GPD1, FBN1, EFEMP1, CHI3L1, KLK1, COL5A3, SLAMF1, CD19, IL1B1, CD274, CNFN, ACE2, CD79B, CP |
| GO:0005576~extracellular region                  | 73 | 2.02E-26    | WAP-3, MASP2, WAP-1, CRHBP, EDN1, FST, IL13, IL-6, HP, PMAP-36, CXCL10, NPG1, NPG3, NPG4, RSPO2, ANGPT1, ANGPT2, GHR, COL10A1, HYAL3, STC2, CRISP2, CA11, LYZ, PMAP-23, MFGE8, INHA, PG-2, RETN, INHBA, F5, GHRL, PLA2G2D, PLA2G2F, C7, PR39, PSP-I, GAST, TRH, POMC, LEAP2, CCL27, TIMP1, ADCYAP1, ZBPB, C1QTNF3, GALP, ACAN, AGRP, IL6, BGLAP, PNLIPRP2, LOC396757, NTF3, LOC396756, IL7, FBN1, CHI3L1, PLG, S100A12, SFRP5, LOC692190, SPAI-2, NPW, PON1, ADM5, ADM2, PYY, BMP7, LIPC, LHB, ASIP, BMP5                                                          |
| GO:0005887~integral component of plasma membrane | 45 | 0.003179019 | STEAP4, FXYD3, DRD1, PRLHR, TNF, CYSLTR2, SHAS2, AQP5, TSPAN9, CD72, GPR1, AQP2, ATP2B1, HCRTR1, HTR1B, UPK1A, MS4A1, TGFA, ADRA2B, SLC22A2, TRPC1, RXFP4, TRPC4, PTGER3, TRPC3, ATP4A, GPR75, SLC22A7, CD40, SLC7A14, EPHA3, NTRK3, GPR33, EPHA4, SLC26A5, SLC7A2, HAS1, HTR7, ATP2A1, PSEN2, CLDN1, HBEGF, ADRA1A, CD79B, ADRA1D                                                                                                                                                                                                                                 |
| GO:0009897~external side of plasma membrane      | 24 | 7.01E-10    | TNF, CXCL9, IL13, ANPEP, MFGE8, ITGB3, ENPEP, CD40, IL7R, SLAMF1, CXCL10, IL12RB2, VCAM1, CCR7, IL17A, IL12RB1, CD19, FCGR1A, CD274, MS4A1, CD79B, THBS1, ENG, CD200R1                                                                                                                                                                                                                                                                                                                                                                                             |

|                                               |    |             |                                                                                             |
|-----------------------------------------------|----|-------------|---------------------------------------------------------------------------------------------|
| GO:0016324~apical plasma membrane             | 14 | 0.001360016 | PRKCZ, TF, MYO7A, AQP5, GJA1, ITGB3, ENPEP, AQP2, UPK1A, SLC2A2, PSEN2, CLDN1, CA4, DPP4    |
| GO:0005578~proteinaceous extracellular matrix | 14 | 0.006379526 | ZP3, LUM, FBN1, CILP, DCN, COL5A3, UNC-6, SHH, TIMP1, ACAN, ADAMTS1, VCAN, COL10A1, ANGPTL4 |
| GO:0031012~extracellular matrix               | 12 | 0.001256135 | ZP3, NDP, EFEMP1, CLU, CILP, TGFB3, MGP, VCAN, MFGE8, DCN, THBS1, MYOC                      |

**Supplemental table 8. KEGG pathway in differentially expressed genes (Control vs LPS)**

| <b>Term</b>                                      | <b>Count</b> | <b>PValue</b> | <b>Genes</b>                                                                                                                                                                                                                                                                                     |
|--------------------------------------------------|--------------|---------------|--------------------------------------------------------------------------------------------------------------------------------------------------------------------------------------------------------------------------------------------------------------------------------------------------|
| ssc04060:Cytokine-cytokine receptor interaction  | 38           | 6.21E-12      | CCL2, TNF, TNFRSF12A, CXCL9, TGFB3, IL-6, IL13, CXCL11, IL7R, CCL27, IL10, CXCL10, IL12RB2, IFN-ALPHA-8, IFN-ALPHA-13, IL17A, IFNA1, IFN-ALPHA-15, IFN-ALPHA-9, IL12RB1, CXCR4, CCL3L1, LTB, LTA, GHR, AMHR2, IL6, IL7, CCL19, CD40, LOC100153661, CCR7, IL1B2, CCR3, IL1B1, IL12B, BMPR1B, BMP7 |
| ssc04080:Neuroactive ligand-receptor interaction | 28           | 1.17E-04      | DRD1, PRLHR, ADORA3, CYSLTR2, ADCYAP1R1, LPAR3, LOC100302368, GHRHR, S1PR2, HCRTR1, HTR1B, CHRNA9, S1PR5, ADRA2B, GHR, RXFP4, PTGER3, GZMA, PLG, SSTR2, B2R, P2RY11, HTR7, ADRA1A, GHSR, LHB, ADRA1D                                                                                             |
| ssc04151:PI3K-Akt signaling pathway              | 26           | 0.009875204   | FGF9, TLR2, IL-6, LPAR3, ITGB3, IL7R, IFN-ALPHA-8, IFN-ALPHA-13, IFNA1, IFN-ALPHA-15, IFN-ALPHA-9, GYS2, NOS3, ANGPT1, THBS1, ANGPT2, GHR, SPP1, IL6, HSP90AA1, IL7, COL5A3, LOC100153661, CD19, PPP2R5E, IKBKB                                                                                  |
| ssc04620:Toll-like receptor signaling pathway    | 25           | 2.08E-11      | IL6, TNF, CXCL9, TLR2, IL-6, FADD, CD40, CXCL11, LOC100153661, CXCL10, TLR9, IFN-ALPHA-8, IFN-ALPHA-13, IFNA1, IFN-ALPHA-9, IFN-ALPHA-15, IL1B2, CD80, CCL3L1, IRF7, IL1B1, IL12B, IKBKB, CD14, SPP1                                                                                             |
| ssc05152:Tuberculosis                            | 22           | 5.62E-05      | IL6, TNF, CEBPB, TGFB3, TLR2, IL-6, FADD, LOC100153661, PMAP-36, IL10, TLR9, IFN-ALPHA-8, IFN-ALPHA-13, IFNA1, IFN-ALPHA-9, IFN-ALPHA-15, IL1B2, FCGR1A, IL1B1, IL12B, CD14                                                                                                                      |
| ssc05164:Influenza A                             | 20           | 2.77E-04      | IL6, TNF, CCL2, IL-6, LOC100302368, NLRP3, LOC100153661, PLG, CXCL10, IFN-ALPHA-8, IFN-ALPHA-13, IFNA1, IFN-ALPHA-9, IFN-ALPHA-15, IL1B2, IRF7, IL1B1, IL12B, IKBKB, MX1                                                                                                                         |

|                                                    |    |             |                                                                                                                                                                 |
|----------------------------------------------------|----|-------------|-----------------------------------------------------------------------------------------------------------------------------------------------------------------|
| ssc05168:Herpes simplex infection                  | 20 | 8.18E-04    | IL6, TNF, CCL2, TLR2, IL-6, FADD, LOC100153661, TLR9, IFN-ALPHA-8, SLA-1, IFN-ALPHA-13, IFNA1, IFN-ALPHA-9, IFN-ALPHA-15, IL1B2, IRF7, IL1B1, IL12B, IKBKB, LTA |
| ssc05162:Measles                                   | 19 | 3.81E-05    | IL6, TLR2, IL13, IL-6, LOC100153661, SLAMF1, TLR9, IFN-ALPHA-8, IFN-ALPHA-13, IFNA1, IFN-ALPHA-9, IFN-ALPHA-15, IL1B2, IRF7, IL1B1, IL12B, MX1, CD28            |
| ssc04630:Jak-STAT signaling pathway                | 17 | 7.91E-04    | IL6, IL7, IL-6, IL13, LOC100153661, IL7R, IL10, IFN-ALPHA-8, IL12RB2, IFN-ALPHA-13, IFNA1, IL12RB1, IFN-ALPHA-9, IFN-ALPHA-15, IL12B, GHR, IL13RA2              |
| ssc04668:TNF signaling pathway                     | 16 | 1.37E-04    | IL6, TNF, CCL2, CEBPB, PTGS2, CXCL2, EDN1, IL-6, FADD, CXCL10, VCAM1, IL1B2, IL1B1, IKBKB, LTA                                                                  |
| ssc05144:Malaria                                   | 15 | 6.45E-08    | IL6, CCL2, TNF, TLR2, TGFB3, IL-6, CD40, IL10, TLR9, VCAM1, CD36, IL1B2, IL1B1, THBS1, HBB                                                                      |
| ssc04640:Hematopoietic cell lineage                | 15 | 1.67E-05    | IL6, TNF, IL7, IL-6, ANPEP, ITGB3, IL7R, CD19, CD36, IL1B2, FCGR1A, IL1B1, MS4A1, PCD1B, CD14                                                                   |
| ssc05323:Rheumatoid arthritis                      | 15 | 3.89E-05    | IL6, CCL2, TNF, TGFB3, TLR2, IL-6, IL17A, CD80, IL1B2, CCL3L1, IL1B1, ANGPT1, LTB, CD28                                                                         |
| ssc05146:Amoebiasis                                | 15 | 3.18E-04    | IL6, TNF, TGFB3, TLR2, IL-6, COL5A3, IL10, C8A, C8B, ARG1, IL1B2, IL1B1, SERPINB10, IL12B, CD14                                                                 |
| ssc05142:Chagas disease (American trypanosomiasis) | 15 | 4.28E-04    | IL6, CCL2, TNF, TGFB3, TLR2, IL-6, FADD, IL10, TLR9, B2R, IL1B2, CCL3L1, IL1B1, IL12B, IKBKB                                                                    |
| ssc05160:Hepatitis C                               | 15 | 0.002341748 | PPARA, TNF, CLDN5, LOC396566, CLDN22, LOC100153661, CLDN14, IFN-ALPHA-8, IFN-ALPHA-13, IFNA1, IFN-ALPHA-9, IFN-ALPHA-15, IRF7, CLDN1, IKBKB                     |
| ssc05320:Autoimmune thyroid disease                | 14 | 3.01E-07    | IFN-ALPHA-8, TG, SLA-1, IFN-ALPHA-13, IFNA1, IFN-ALPHA-9, IFN-ALPHA-15, CD80, GZMB, CD40, LOC100153661, IL10, CD28                                              |
| ssc04623:Cytosolic DNA-sensing pathway             | 14 | 3.49E-06    | IL6, IL-6, LOC100153661, CXCL10, IFN-ALPHA-8, IFN-ALPHA-13, IFNA1, IFN-ALPHA-9, IFN-ALPHA-15, IL1B2, IRF7, IL1B1, IKBKB, ZBP1                                   |
| ssc05321:Inflammatory bowel disease (IBD)          | 13 | 1.98E-05    | IL12RB2, IL17A, IL6, IL12RB1, TNF, IL1B2, IL1B1, TGFB3, TLR2, IL13, IL-6, IL12B, IL10                                                                           |

|                                                |    |             |                                                                                                                         |
|------------------------------------------------|----|-------------|-------------------------------------------------------------------------------------------------------------------------|
| ssc04622:RIG-I-like receptor signaling pathway | 13 | 6.16E-05    | IFN-ALPHA-8, IFN-ALPHA-13, IFNA1, IFN-ALPHA-9, TNF, IFN-ALPHA-15, IRF7, FADD, IL12B, IKBKB, LOC100153661, DHX58, CXCL10 |
| ssc04350:TGF-beta signaling pathway            | 12 | 8.33E-04    | AMHR2, INHBA, TNF, CDKN2B, FST, TGFB3, DCN, BAMBI, BMPR1B, BMP7, THBS1, BMP5                                            |
| ssc05143:African trypanosomiasis               | 11 | 2.11E-06    | VCAM1, IL6, TNF, IL1B2, THOP1, IL1B1, IL-6, IL12B, HBB, IL10, TLR9                                                      |
| ssc04064:NF-kappa B signaling pathway          | 11 | 0.008343059 | VCAM1, TNF, IL1B2, PTGS2, IL1B1, CCL19, CD40, IKBKB, LTB, CD14, LTA                                                     |
| ssc05332:Graft-versus-host disease             | 10 | 1.79E-05    | SLA-1, IL6, TNF, IL1B2, CD80, IL1B1, IL-6, GZMB, CD28                                                                   |
| ssc04940:Type I diabetes mellitus              | 10 | 8.95E-05    | SLA-1, TNF, IL1B2, CD80, IL1B1, GZMB, IL12B, LTA, CD28                                                                  |
| ssc00830:Retinol metabolism                    | 10 | 7.94E-04    | RDH12, DHRS4, CYP1A1, AOX2, SDR16C5, CYP2A19, CYP1A2, PNPLA4, CYP4A24, CYP2C49                                          |



Supplemental table 9. list of primers

| Gene symbol                    | Description                                                          | Accession No. | Primers (5' --> 3')   |                       |
|--------------------------------|----------------------------------------------------------------------|---------------|-----------------------|-----------------------|
|                                |                                                                      |               | Forward               | Reverse               |
| <i>HMGCS3</i>                  | 3-hydroxy-3-methylglutaryl-CoA synthase 2                            | NM_214380     | CAGGACTCAGGCAACTGA    | GACAGCGATGTCTCCACAGA  |
| <i>LDHC</i>                    | lactate dehydrogenase C                                              | NM_001195775  | ATTGTTTCAAATCCGGTGGGA | TTCAGAGCAACACCAGCAAC  |
| <i>PHERO C</i>                 | pheromaxein C subunit                                                | NM_001123161  | GCAGGTTCTGGCTGTTCCTA  | CACTTGCATAAACACGCTGAA |
| <i>TNNC2</i>                   | troponin C2, fast skeletal type                                      | NM_001001862  | CCTACCTCAGCGAGGAGATG  | TCTTCGAAGTCGATGGTTCC  |
| <i>LGALS13</i>                 | lectin, galactoside-binding, soluble, 13                             | NM_001142841  | GTCCCTACACGAAGCATGT   | AAGCTCACTCGGAAGTGGAA  |
| <i>XDHS</i>                    | xanthine dehydrogenase                                               | NM_001285974  | AACAGCCTGGACCTCTCTCA  | TACTGCGACCTCACTCATC   |
| <i>MYH2</i>                    | myosin, heavy chain 2, skeletal muscle, adult                        | NM_214136     | GGAAAGTCGCAGAACAGGAG  | CGAGCTTCTGGAGAATGTC   |
| <i>SALI</i>                    | salivary lipocalin                                                   | NM_213814     | ATGTCAATGGCGACAAAACA  | AGTTGGAAGCAGCGATCAAT  |
| <i>SLC2A2</i>                  | solute carrier family 2 member 2                                     | NM_001097417  | GGGTTCTTCCAGTTTGAT    | GGCTAGCAGATGCCGTAGTC  |
| <i>SDR16C5</i>                 | short chain dehydrogenase/reductase family 16C, member 5             | NM_001195368  | GGCAGAAAGTTCCTCGACTG  | GCTGCAAATTTACTCGCACA  |
| <i>NF-<math>\kappa</math>B</i> | Nuclear factor of kappa light polypeptide gene enhancer in B-cells 1 | NM_001048232  | GACAACATCTCCTTGGCGGG  | TCTGCTCCTGCTGCTTTGAGG |
| <i>TNF-<math>\alpha</math></i> | Tumor necrosis factor alpha                                          | NM_214022     | TCTCCTTCCTCCTGGTCGCA  | TCCCTCGGCTTTGACATTGG  |
| <i>IFN-<math>\gamma</math></i> | Interferon gamma                                                     | NM_213948     | GGCCATTCAAAGGAGCATGG  | GATGGCTTTGCGCTGGATCT  |
| <i>IL-6</i>                    | Interleukin-6                                                        | NM_214399     | AGCCACCAGGAACGAAAGA   | AGCCATCACCAGAAGCAGCC  |
| <i>SOD1</i>                    | Superoxide dismutase 1                                               | NM_001190422  | GTACCAGTGCAGGTCCTCAC  | TTTGCCAGCAGTCACATTGC  |
| <i>GCLM</i>                    | Glutamate-cysteine ligase modifier subunit                           | XM_001926378  | TTGGAGCAGCTGTACCAGTG  | GAGCTTCTGGAAACTCGCT   |
| <i>GCLC</i>                    | Glutamate-cysteine ligase catalytic subunit                          | XM_003482164  | GTCCAGTTGGTCTGTCTGG   | CGGGAGTCCCTTCGATCATG  |
| <i>CAT</i>                     | Catalase                                                             | NM_214301     | ACACAGGCACATGAACGGAT  | GTCCCGGATGCCATAGTCAG  |
| <i>ZO-1</i>                    | Zonula occludens 1                                                   | XM_021098856  | GATCCTGACCCGGTGTCTGA  | TTGGTGGGTTTGGTGGGTTG  |
| <i>OCN</i>                     | Occludin                                                             | NM_001163647  | GAGAGAGTGGACAGCCCAT   | TGCTGCTGTAATGAGGCTGC  |
| <i>MMP2</i>                    | matrix metalloproteinase 2                                           | NM_214192     | ACTCCACTTTGACGACGAT   | CGTACTTGCCATCCTTGTCG  |
| <i>MMP9</i>                    | matrix metalloproteinase 9                                           | NM_001038004  | TGAAGACGCAGAAGGTGGAT  | TTCAGGAGGTGGAAGGTCAC  |
| <i>CDH1</i>                    | cadherin 1                                                           | NM_001039258  | TGTACGAAGGTGTGGTGGAA  | AGCGGCTCTTGGTCTCATAA  |
| <i>RND3</i>                    | Rho family GTPase 3                                                  | XM_422158     | CAACATGTGGGACACCTCAG  | ATTTGCAACCAACCAAAAGC  |
| <i>GAPDH</i>                   | glyceraldehyde-3-phosphate dehydrogenase                             | NM_204305     | GGTGGTGCTAAGCGTGTTAT  | ACCTCTGTCATCTCTCCACA  |
